# Supplementary material
Source: Research Square preprint supplement (doi:10.21203/rs.3.rs-9515111/v1)
Supplement: Supplementary file 1 [file 6873e779b94377436f71882d.docx]

**SUPPLEMENTARY MATERIAL**

**VALORIZATION POTENTIAL OF BY-PRODUCTS FROM TECHNOLOGICALLY PROCESSED QUINCE FRUIT IN INNOVATIVE FOOD PRODUCTS**

VOLLMANNOVA Alena, TOTH Tomas, LIDIKOVA Judita, MUSILOVA Janette, CERYOVA Natalia, JAKUBCINOVA Jana*

Institute of Food Sciences, Faculty of Biotechnology and Food Sciences, Slovak University of Agriculture in Nitra, Tr. A. Hlinku 2, 94976 Nitra, Slovakia

*Corresponding author:jana.jakubcinova@uniag.sk

**Material and Methods**

**Plant material**

Nine selected quince varieties (Aurelia, Cydora Robusta, Hruškovitá, Izobilnaja, Kocúrova, Konstantinopolska, Morava, Otličnica, and Plovdivskaja) were obtained from the organic farm Blatnička (Czech Republic) and were analyzed over a three-year period.

Aurelia – hard, aromatic fruits with a smooth yellow-green skin.

Cydora Robusta – large, fragrant and bright yellow fruits with a medium-thick yellow skin.

Hruškovitá – deep yellow, pear-shaped, plump fruits.

Izobilnaja – fruits of a typical wide, pear-shaped shape, lemon-yellow color, hard, very aromatic, skin.

Kocúrova – pear-shaped fruits with deep yellow skin, with a distinctive aroma and taste.

Konstanopolska – apple-shaped fruits with a distinctive aroma, light yellow flesh, juicy, delicate, aromatic.

Morava – large fruits with a velvety surface and an intense yellow color when ripe.

Otličnica – large fruits with a firm bright yellow skin.

Plovdivskaja – large fruits with yellow skin and pale-yellow flesh.

Organic Farm Blatnička is a small organic farm in the foothills of the White Carpathian Mountanis close to the Czech-Slovak border. The Blatnička farm focuses primarily on the production of old forgotten varieties of fruit or other traditional crops, which are now considered to be forgotten plant species. Many of them are being rediscovered today due to their unique composition and content of biologically valuable components, and there is currently a growing interest in their use in innovative food products. For example, minority traditional fruit species such as chokeberry, dogwood, hawthorn, medlar, rosehip, rowan, mulberry or quince are grown in Blatnička. In its eco-orchards in South Moravia, the Blatnička farm currently grows 39 varieties of quince.

**Sample preparation**

After sampling the quince fruits, the fruits were cleaned in distilled water and then dried on filter paper at room temperature (22°C). The quince fruits were peeled, and the peels were used to prepare the extract.

**Extract preparation**

All quince peel samples were homogenized (Grindomix GM 200, Retsch GmbH, Germany) and 25 g of the homogenized material was extracted with 50 ml of 80% methanol for 12 h on a horizontal shaker (Heidolph Promax 1020, Heidolph Instruments GmbH, Germany) at 115 oscillations per minute. After shaking, the extracts were filtered through Munktel No. 392 filter paper (Munktell & Filtrac GmbH, Germany). The extracts prepared in this way were stored in sealable centrifuge tubes at 4°C in a refrigerator until analysis.

**Chemical analysis**

*Content of macroelements*

Dried samples (1 g) were digested with 10 mL concentrated HNO₃ and 5 mL concentrated HClO₄. The mixtures were left to stand overnight and subsequently mineralized in a sand bath until the evolution of white fumes indicated complete digestion. After cooling, the digests were filtered into 100 mL volumetric flasks, and the filter paper was rinsed with hot redistilled water. The solutions were then brought to volume with redistilled water. Reagent blanks were prepared following the same procedure. Prior to analysis, an aliquot (2 mL) of each digest was diluted to 50 mL with redistilled water. Elemental concentrations were determined by flame atomic absorption spectrometry (AAS) using a Varian AA 240FS. The following wavelengths were used: K (766.5 nm), Ca (422.7 nm), Na (589.0 nm), and Mg (285.2 nm) **[1,2]**.

Phosphorus was determined using the molybdenum blue method **[3]**. An aliquot of the digest (1 mL) was transferred to a 50 mL volumetric flask, mixed with 8 mL of color reagent (Solution A), and diluted to volume with redistilled water. The mixture was allowed to stand for 2 h at room temperature to ensure full color development. Absorbance was then measured at 666 nm using a Shimadzu UV-1800. Solution A (color reagent) was prepared by dissolving 2.64 g of ascorbic acid in a mixture containing 500 mL of Solution B and diluting to 2 L with redistilled water. Solution B consisted of 148 mL concentrated H₂SO₄, 12 g ammonium molybdate ((NH₄)₂MoO₄), and 0.2908 g potassium antimonyl tartrate, diluted to volume with redistilled water.

*Content of microelements*

Dried samples were homogenized, and 1 g of each sample was subjected to microwave-assisted digestion using a mixture of 5 mL redistilled water and 5 mL extra-pure concentrated HNO₃ (1:1, v/v). Digestion was performed in sealed vessels using a CEM MARS Xpress. The digestion program (total time 55 min) consisted of three steps: ramp to 160 °C over 15 min at 800 W (90% power), hold at 160 °C for 20 min, and cooling.

After digestion, the solutions were filtered through quantitative filter paper (Munktell grade 390) into 50 mL volumetric flasks and diluted to volume with redistilled water.

Elemental analysis was carried out by atomic absorption spectrometry using a Varian AA 240FS/240Z. Copper (324.8 nm), zinc (213.9 nm), manganese (279.5 nm), iron (248.3 nm), chromium (357.9 nm), nickel (232.0 nm), and cobalt (240.7 nm) were determined by flame AAS, while lead (217.0 nm) and cadmium (228.8 nm) were quantified using graphite furnace AAS with Zeeman background correction **[1,4]**.

*Total polyphenol content*

Total polyphenol content (TPC) was determined using the Folin–Ciocalteu method **[5]**. An aliquot of the methanolic extract (0.1 mL) was mixed with 2 mL of distilled water in a 50 mL volumetric flask, followed by the addition of Folin–Ciocalteu reagent. After 3 min, 5 mL of 20% (w/v) sodium carbonate solution was added, and the mixture was diluted to volume with distilled water. The reaction mixture was incubated for 2 h at room temperature to allow the formation of a blue-colored complex.

Absorbance was measured at 765 nm using a PG Instruments T92+ against a reagent blank. A calibration curve was constructed using gallic acid as the standard, and results were expressed as mg gallic acid equivalents per g of dry weight (mg GAE/g DW). All measurements were performed in quadruplicate.

*Antioxidant activity*

***DPPH radical scavenging assay***

Antioxidant activity was evaluated using the DPPH radical scavenging method **[6]**. A solution of 0.06 mM DPPH• (2,366 mg in 100 mL methanol, 99.8%) was prepared and stored at 4 °C in the dark. The initial absorbance (A₀) of the DPPH solution was measured at 515.6 nm using a PG Instruments T92+.

An aliquot of the extract (0.1 mL) was added to the DPPH• solution, and the absorbance (A₁₀) was recorded after 10 min of incubation in the dark. Results were quantified using a Trolox calibration curve and expressed as mmol Trolox equivalents per kg dry weight (mmol TE/kg DW). All measurements were performed in quadruplicate.

***ABTS radical scavenging assay***

The ABTS assay was performed according to Re et al. **[7]**. The ABTS•⁺ radical cation was generated by reacting

7 mM ABTS (2,2′-azinobis-(3-ethylbenzothiazoline-6-sulfonic acid)) with 2,45 mM potassium persulfate and

diluted in acetate buffer (pH 4.5) to obtain the ABTS•⁺ solution. A volume of 3 mL of ABTS•⁺ solution was mixed

with 0.05 mL ofextract, incubated in the dark for 20 min, and absorbance was measured at 734 nm using a

Shimadzu UV-1800.

Antioxidant activity was calculated from a Trolox calibration curve and expressed as mmol TE/kg. DW. All

analyses were performed in quadruplicate.

***FRAP assay***

Ferric reducing antioxidant power (FRAP) was determined according to Benzie and Strain **[8]**. The FRAP reagent was prepared from 10 mM TPTZ (2,4,6-tris(2-pyridyl)-s-triazine), 20 mM FeCl₃, and acetate buffer (pH 3.6) and incubated in 37°C for 10 minutes.

A mixture of 3 mL FRAP reagent and 0.05 mL extract was incubated in in 37°C for 4 minutes, and absorbance was measured at 593 nm using a Shimadzu UV-1800. Antioxidant activity was calculated using a Trolox calibration curve and expressed as mmol TE/kg DW. All measurements were conducted in quadruplicate.

*Content of selected phenolics*

Before HPLC analysis, the prepared methanol extracts were filtered through a Q-Max syringe filter (0.22 μm, 25 mm, PVDF) (Frisenette ApS, Knebel, Denmark) into HPLC vials.

The content of individual selected compounds was determined using an Agilent 1260 Infinity II HPLC high-performance liquid chromatograph (Agilent Technologies, Waldbronn, Germany) with a diode array detector. The quantification wavelength was set to 320 nm for chlorogenic, cryptochlorogenic, neochlorogenic and 3,5- dicaffeoylquinic acid and to 372 nm for rutin. The content of the determined compounds was expressed in mg/kg DW.

**Statistical analysis**

Data are presented as mean ± standard deviation of three independent replicates. Statistical analyses were performed using XLSTAT **[9].** All statistical tests were evaluated at a significance level of α = 0.05. Prior to analysis, the normality of data distribution was evaluated using the Shapiro–Wilk test, and homogeneity of variances was assessed using Levene’s test. For parameters that met the criteria of normal distribution, differences in individual cultivars among years were evaluated using one-way analysis of variance (ANOVA). When significant effects were detected, Tukey’s honestly significant difference (HSD) test was applied for post hoc multiple comparisons. For datasets that did not meet the assumption of normality, a non-parametric Kruskal–Wallis test was employed. In cases where significant differences were observed, pairwise comparisons were conducted using Dunn’s test with Holm–Bonferroni correction to control for type I error. As several variables exhibited non-normal distribution, data were log-transformed [log₁₀(x + 1)] to improve normality and homoscedasticity. Despite transformation, selected variables (Pb, Cd, Cr, Ni, Co, ABTS, neochlorogenic acid, and chlorogenic acid) did not fully meet the assumption of normality; therefore, the results for these variables were interpreted with caution. Nevertheless, given the balanced experimental design, ANOVA was considered robust to moderate deviations from normality and was used primarily to describe overall variability patterns. The effects of cultivar, year, and their interaction were evaluated using two-way analysis of variance (ANOVA). Effect sizes were expressed as eta squared (η²) and omega squared (ω²), enabling quantification of the proportion of explained variance. Correlation analysis was performed using Spearman’s rank correlation coefficient to evaluate relationships between mineral elements, phenolic compounds, and antioxidant activity parameters, due to the non-normal distribution of several variables. Principal component analysis (PCA) was conducted to explore multivariate relationships and identify patterns in the dataset. Variables were standardized prior to analysis, and principal components with eigenvalues greater than 1 were retained for interpretation. PCA results were visualized using biplots to assess the relationships between samples and variables.

1. Welz B, Sperling M (1999) *Atomic absorption spectrometry*. Wiley-VCH, Weinheim. <https://doi.org/10.1002/9783527611690>
2. AOAC International (2019) *Official methods of analysis of AOAC International*, 21st edn. AOAC International, Rockville, MD.
3. Murphy J, Riley JP (1962) A modified single solution method for the determination of phosphate in natural waters. *Anal Chim Acta* 27:31–36. <https://doi.org/10.1016/S0003-2670(00)88444-5>
4. United States Environmental Protection Agency (USEPA) (1996) *Test methods for evaluating solid waste, SW-846. Method 3052: Microwave-assisted acid digestion of siliceous and organically based matrices*. U.S. EPA, Washington, DC.
5. Singleton VL, Orthofer R, Lamuela-Raventós RM (1999) Analysis of total phenols and other oxidation substrates and antioxidants by means of Folin-Ciocalteu reagent. In: Packer L (ed) Methods in enzymology, vol 299. Academic Press, San Diego, pp 152–178. <https://doi.org/10.1016/S0076-6879(99)99017-1>
6. Brand-Williams W, Cuvelier ME, Berset C (1995) Use of a free radical method to evaluate antioxidant activity. *LWT Food Sci Technol* 28:25–30. <https://doi.org/10.1016/S0023-6438(95)80008-5>
7. Re R., Pelegrini, N, Proteggente, A, Pannala, A, Yang, M, Rice-Evans, C (1999). Antioxidant activity

applying an improved abts radical cation decolorization assay. *Free Radical Biology & Medicine,*vol. 26, nos. 9/10, pp. 1231–1237. [https://doi.org/ 10.1016/s0891-5849(98)00315-3](https://doi.org/10.1016/S0023-6438(95)80008-5).

1. Benzie IFF, Strain JJ (1996) The ferric reducing ability of plasma (FRAP) as a measure of “antioxidant power”: The FRAP assay. *Anal Biochem* 239:70–76. <https://doi.org/10.1006/abio.1996.0292>
2. Lumivero (2026) XLSTAT statistical and data analysis solution (Version 2026.1) [Computer software]. <https://www.xlstat.com>
